# Supplementary material
Source: MDPI journal article supplement (https://www.mdpi.com/2073-4344/13/2/434)
Supplement: s1 [file s1]

## Supporting Information

# Photocatalytic degradation of paracetamol under simulated sunlight by four TiO<sub>2</sub> commercial powders: an insight into the performance of two sub-micrometric anatase and rutile powders and a nanometric brookite powder.

Nicola Blangetti,<sup>1</sup> Francesca S. Freyria,<sup>1,\*</sup> Maria Chiara Calviello,<sup>1</sup> Nicoletta Ditaranto,<sup>2</sup> Salvatore Guastella,<sup>1</sup> Barbara Bonelli<sup>\*,1,3</sup>

<sup>1</sup> Department of Applied Science and Technology and INSTM Unit of Torino-Politecnico, Corso Duca degli Abruzzi 24, I-10129 Torino (Italy)

<sup>2</sup> Dipartimento di Chimica, Università degli Studi di Bari Aldo Moro, 70125 Bari, Italy

<sup>3</sup> Interdepartmental Centre Polito<sup>BIO</sup>Med Lab; Corso Duca degli Abruzzi 24, I-10129 Torino (Italy)

\* Correspondence: francesca.freyria@polito.it (FSF); barbara.bonelli@polito.it (BB)

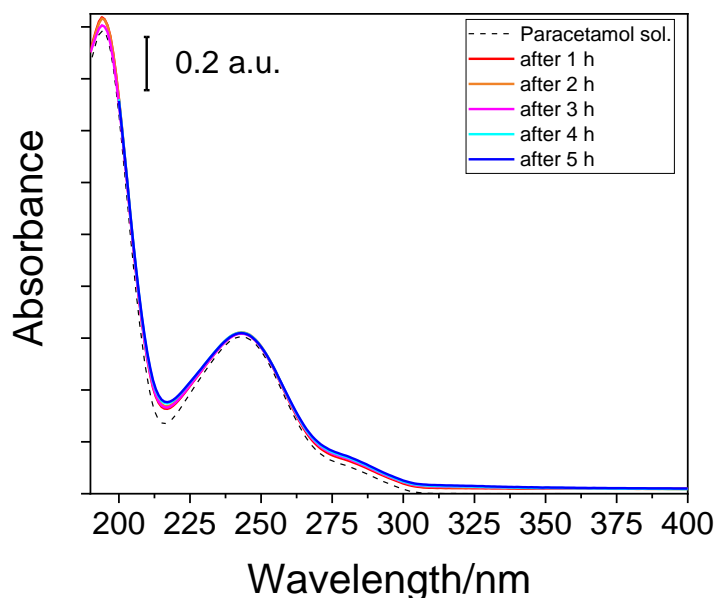

**Figure S.1.** UV-Vis spectra of the starting 0.01 mM paracetamol solution and of the supernatant aliquots withdrawn after 1, 2, 3, 4, and 5 h under solar illumination without any photocatalyst.

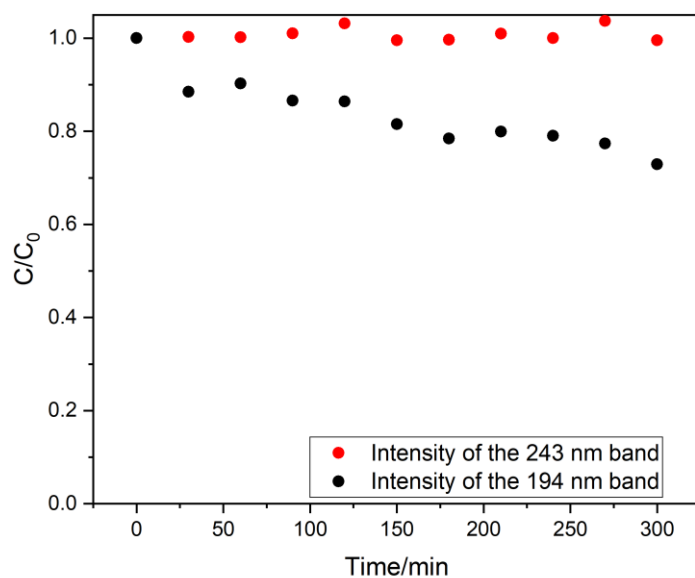

**Figure S.2.** Trends of the  $C/C_0$  values as obtained from the UV-Vis spectra of the starting 0.01 mM paracetamol solution ( $C_0$ ) and of the supernatant aliquots withdrawn at regular time intervals under solar illumination in the presence of the oxidized Comm\_R sample.

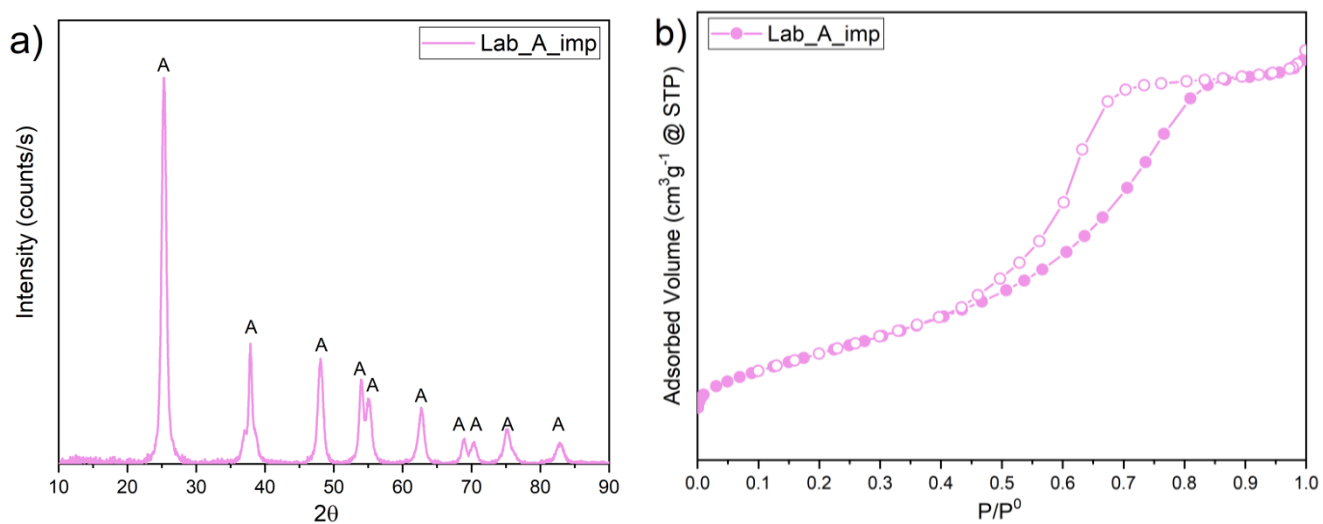

**Figure S.3.** a) XRD patterns of the Lab\_A\_imp sample, showing only the peaks of the anatase phase (A); b) N<sub>2</sub> adsorption/desorption isotherms at -196 °C of the Lab\_A\_imp sample, showing type IV isotherm, with a pronounced H2 type hysteresis loop, due to inkbottle inter-particle mesopores and a BET SSA = 105 m<sup>2</sup> g<sup>-1</sup>.

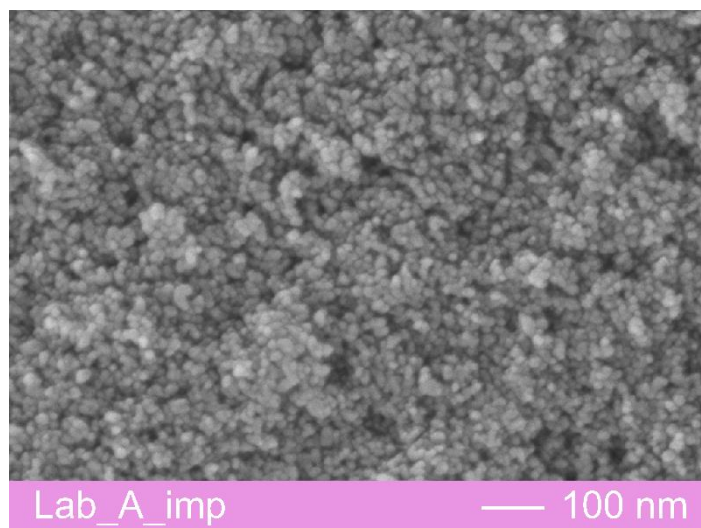

**Figure S.4.** Selected FESEM micrograph of the Lab\_A\_imp sample, showing the same morphology of the parent Lab\_A sample.

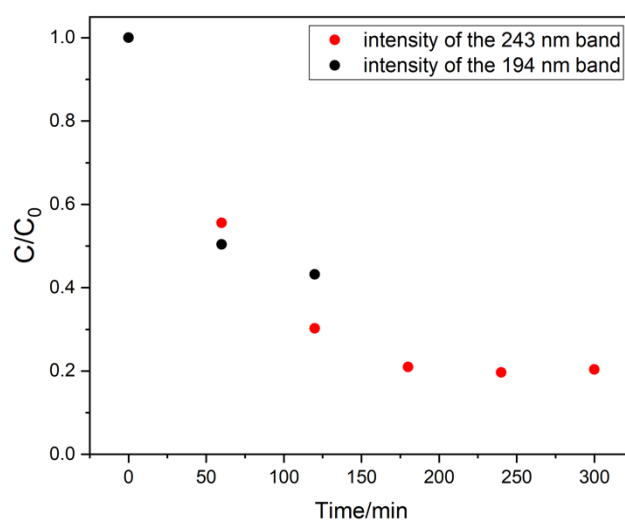

**Figure S.5.** Trends of the  $C/C_0$  values as obtained from the UV-Vis spectra of the starting 0.01 mM paracetamol solution ( $C_0$ ) and of the supernatant aliquots withdrawn at regular time intervals under solar illumination in the presence of 1 g L<sup>-1</sup> Lab\_A\_imp powder.
